# Supplementary material for: Exogenous Arachidonic Acid Affects Fucoxanthin Biosynthesis and Photoprotection in Phaeodactylum tricornutum
Source: MDPI journal article supplement (doi:10.3390/md20100644), 2022-10-17
Supplement: s1 [file s1]

## Supplementary Information for

### Exogenous Arachidonic Acid Affects Fucoxanthin Biosynthesis and Photoprotection in *Phaeodactylum tricornutum*

Shuaiqi Zhu<sup>1,2</sup>, Song Bin<sup>2</sup>, Shan Lu<sup>1\*</sup>, Wenqiang Yang<sup>2,3,4\*</sup>

#### Affiliations:

<sup>1</sup>State Key Laboratory of Pharmaceutical Biotechnology, School of Life Sciences, Nanjing University, Nanjing, 210023, China

<sup>2</sup>Photosynthesis Research Center, Key Laboratory of Photobiology, Institute of Botany, Chinese Academy of Sciences, Beijing, 100093, China

<sup>3</sup>University of Chinese Academy of Sciences, Beijing, 100049, China

<sup>4</sup>Innovative Academy of Seed Design, Chinese Academy of Sciences, Beijing 100093, China

\*Correspondence: shanlu@nju.edu.cn (S.L.); wqyang@ibcas.ac.cn (W.Y.);

Tel.: +86-18651613471(S.L.); +86-18211169660 (W.Y.)

#### Supplemental Table S1. Primers used for RT-qPCR in this study.

| Gene name      | Accession number | Primer sequence (5'-3')                                          |
|----------------|------------------|------------------------------------------------------------------|
| <i>β-ACTIN</i> | AY_713398.1      | ACT-F: AGACCATTATGAAGTGCGAT<br>ACT-R: ACCCTCCAATCCAAACAG         |
| <i>LCYB</i>    | XM_002176576.1   | LCYB-F: CCCCAATAACGACAAACACG<br>LCYB-R: CAAAGAACGGCGTCACAGAT     |
| <i>PSY</i>     | XM_002178740.1   | PSY-F: ATCCCACCTTGGACATTACG<br>PSY-R: GTTCACTAGCATCTTCGCCTA      |
| <i>PDS</i>     | XM_002184476.1   | PDS-F: TTGCTCCGAATACGAATGTG<br>PDS-R: CACCACCCACGACGATAACT       |
| <i>CRTISO</i>  | XM_002179795.1   | CISO-F: AGATGATGTGACAGCCGAGC<br>CISO-R: TTTTCGTCCTTTAGTTCGTTGTAG |
| <i>ZDS</i>     | XM_002176649.1   | ZDS-F: GATTGCCTACGCTTTGGG<br>ZDS-R: GCATGGGCTGCTAAGATTGA         |
| <i>ZEP</i>     | XP_002180238     | ZEP-F: GCAATGGTTCGCACTGATAC<br>ZEP-R: GTAGGCAAAGTCATCCCACA       |
| <i>LHCX1</i>   | XP_002179760.1   | LHCX1-F: CCTTGCTCTTATCGGCTCTG                                    |

|              |                |                                |
|--------------|----------------|--------------------------------|
|              |                | LHCX1-R: ACGGTATCGCTTCAAAGTGG  |
| <i>LHCX2</i> | XP_002176987.1 | LHCX2-F: CAGCACTAATGCCGCTTTTCG |
|              |                | LHCX2-R: CGTGAGTAACTTCCGCTTCC  |
| <i>LHCX3</i> | XP_002178699.1 | LHCX3-F: TCCCGTTGGTATCTTTGATCC |
|              |                | LHCX3-R: GAAGATCCTTCCACGGCTTC  |
| <i>LHCX4</i> | XP_002182760.1 | LHCX4-F: TCTTTGATCCACTCCGCTTC  |
|              |                | LHCX4-R: GGCGTTCCATAGAAAGTTCG  |

---
